# Supplementary material for: Extracellular HSP90α-LRP1 Signaling Promote Pancreatic Cancer Metastasis and Chemoresistance Via Regulating Epithelial-To-Mesenchymal Transition
Source: Research Square preprint supplement (doi:10.21203/rs.3.rs-1088653/v1), 2021-11-30
Supplement: Supplementary file 1 [file fed172ad026159755a9addda.docx]

Extracellular HSP90α-LRP1 signaling promote pancreatic cancer metastasis and chemoresistance via regulating epithelial-to-mesenchymal transition

Nina Xue1, Tingting Du1, Fangfang Lai, Jing Jin, Ming Ji*, Xiaoguang Chen*

State Key Laboratory of Bioactive Substances and Functions of Natural Medicines & Beijing Key Laboratory of Non-Clinical Drug Metabolism and PK/PD study, Institute of Materia Medica, Chinese Academy of Medical Sciences and Peking Union Medical College, Beijing 100050, China

1These authors contributed equally to this work.

*Correspondence to: Ming Ji and Xiaoguang Chen

E-mail address: [Jiming@imm.ac.cn](mailto:Jiming@imm.ac.cn) (M. Ji); [chxg@imm.ac.cn](mailto:chxg@imm.ac.cn) (X. Chen)

Acknowledgements

This project was supported by the National Natural Science Foundation of China (81573466).

**
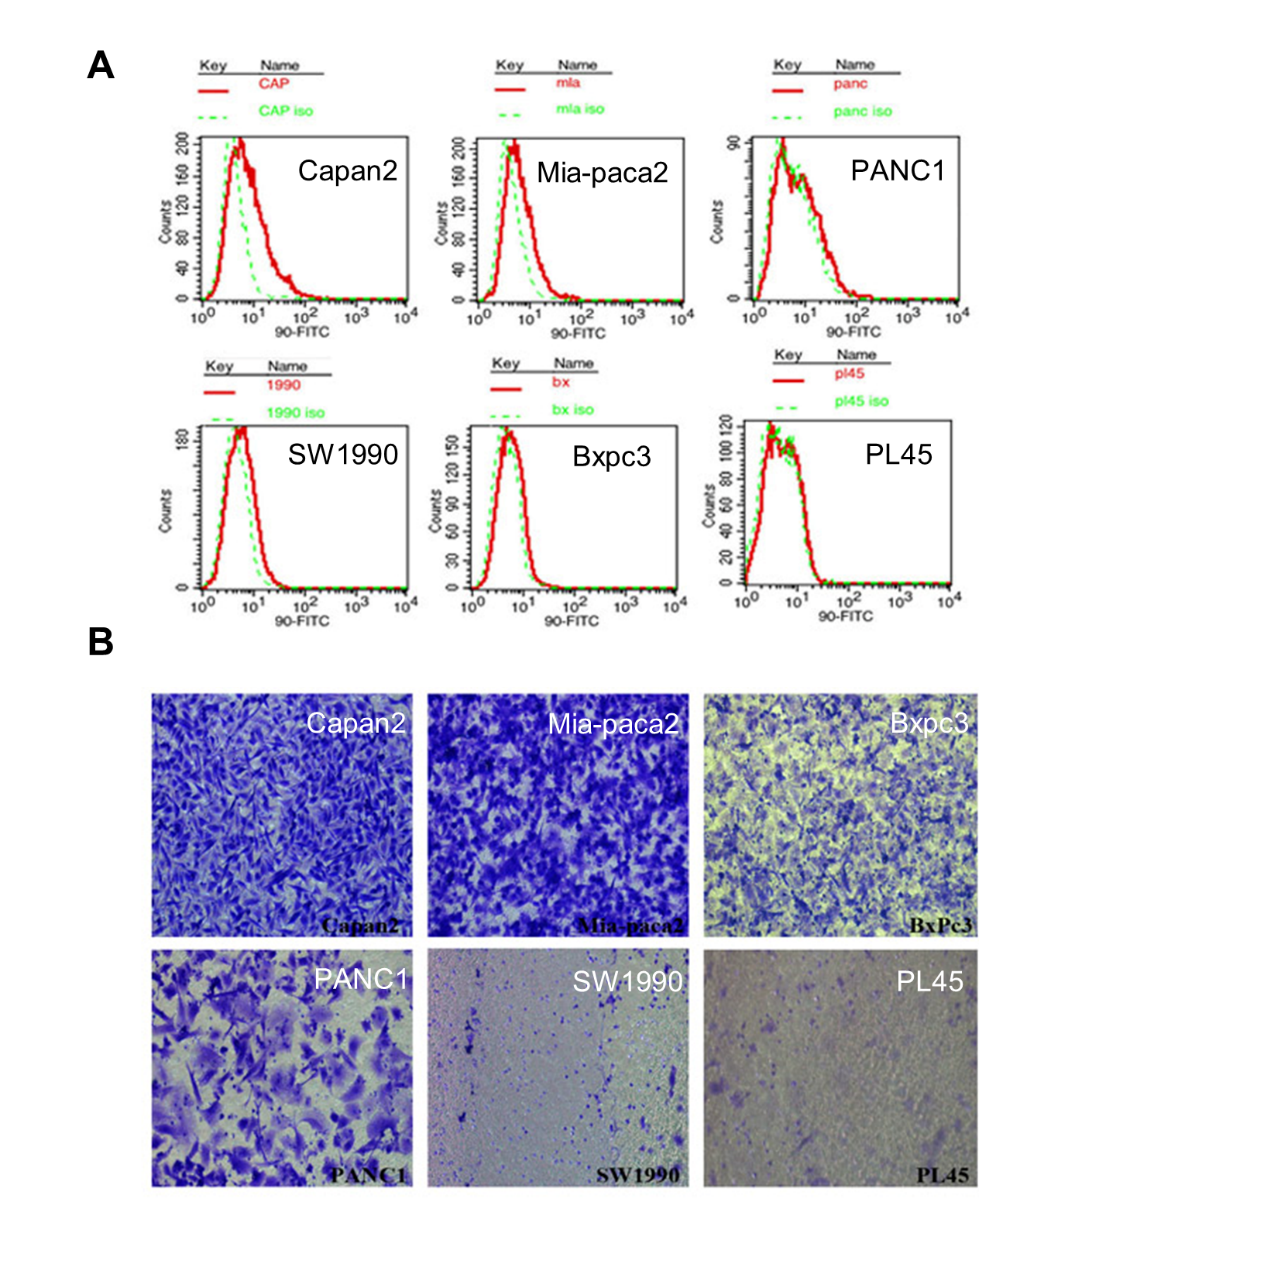
**

**Figure 1S** Membrane HSP90α expression and invasive ability of PC cells. **(A)** The cell surface HSP90α levels of Capan2, Mia-paca2, PANC1, SW1990, Bxpc3 and PL45 cells after serum starvation were detected using flow cytometry analysis. **(B)** The invasive abilities of above-mentioned PC cells were detected by transwell assay.


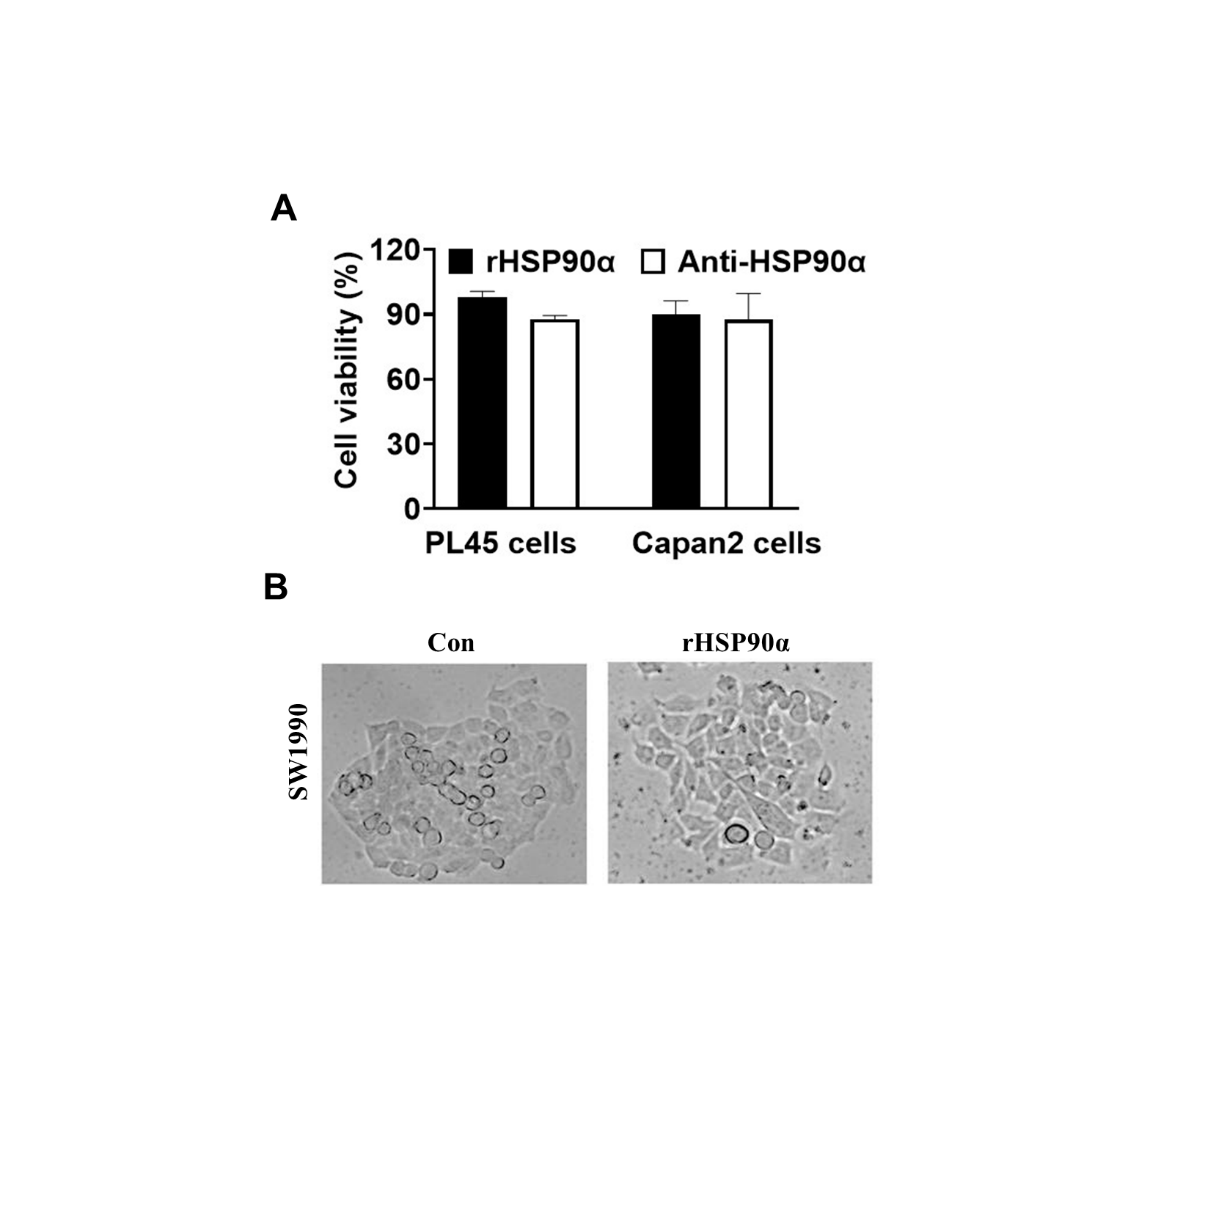


**Figure 2S** Cell viability and cellular morphology of PC cells.**(A)** The cell viability of PL45 and Capan2 was determined by MTT assay after exposure of (10μg/mL) rHSP90α or (5μg/mL) anti-HSP90α antibody for 72 h. **(B)** Images of SW1990 cells morphology were measured under a microscope after stimulated by (10μg/mL) rHSP90α for 72 h.
